# Supplementary material for: Pro-Inflammatory Responses in Human Bronchial Epithelial Cells Induced by Spores and Hyphal Fragments of Common Damp Indoor Molds
Source: MDPI journal article supplement (doi:10.3390/ijerph16061085), 2019-03-26
Supplement: s1 [file s1]

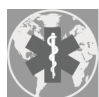

Supplementary

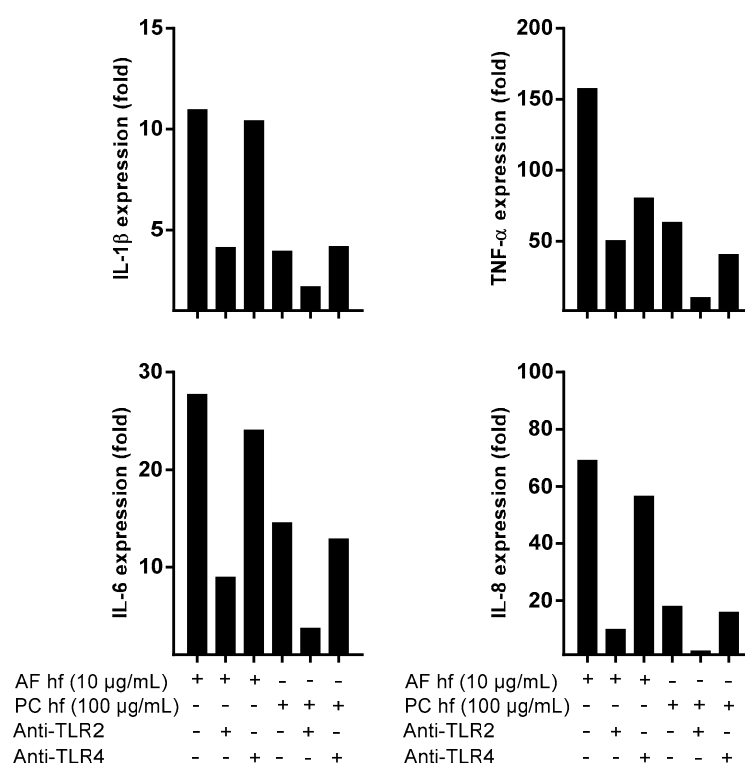

**Supplementary Figure S1: Inhibition of *A. fumigatus*- or *P. chrysogenum*-induced cytokine/chemokine gene expression by TLR2 and TLR4 antagonist molecules.** Cells were pretreated with human anti-TLR2 (MAB2616, 0.2  $\mu$ g/mL) or anti-TLR4 (AF1478, 10  $\mu$ g/mL) for 1 h and further incubated with X-ray treated hyphal fragments (hf) of *A. fumigatus* (AF; 10  $\mu$ g/mL) or *P. chrysogenum* (PC; 100  $\mu$ g/mL) for 6 h. Medium blanks were included as control. The expression of IL-1 $\beta$ , TNF- $\alpha$ , IL-6 and IL-8 were assessed with real-time RT-PCR. Bars represent one independent experiment.

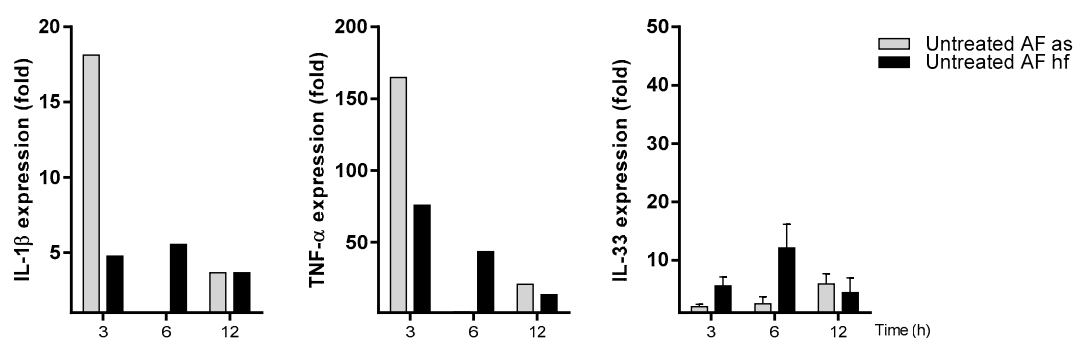

**Supplementary Figure S2: Time-dependent IL-1 $\beta$ , TNF- $\alpha$  and IL-33 expression after exposure to untreated *A. fumigatus* spores and hyphal fragments.** Cells were exposed to *A. fumigatus* aerosolized spores (as), hyphal fragments (hf) for three different time points. Medium blanks were included as control. The expression of IL-1 $\beta$ , TNF- $\alpha$  and IL-33 were assessed by real-time RT-PCR. Bars represent one independent experiment or the mean  $\pm$  SEM of three independent experiments (IL-33).

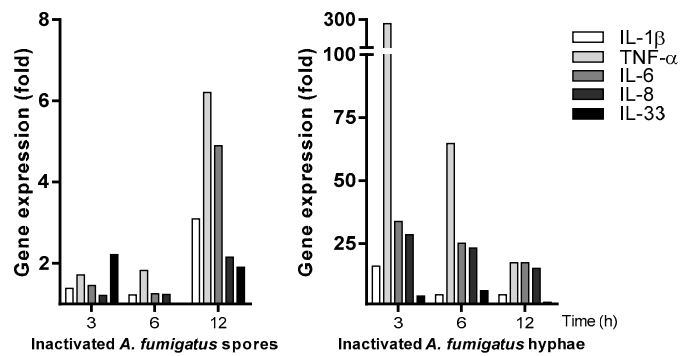

**Supplementary Figure S3: Time-dependent gene expression after exposure to X-ray treated *A. fumigatus* spores and hyphal fragments.** Cells were exposed to X-ray treated *A. fumigatus* aerosolized spores (as), hyphal fragments (hf) for three different time points. The expression of IL-1 $\beta$ , TNF- $\alpha$ , IL-6, IL-8 and IL-33 were assessed by real-time RT-PCR. Bars represent one independent experiment.
